# Supplementary material for: Overexpression of Striated Muscle Activator of Rho Signaling (STARS) Increases C2C12 Skeletal Muscle Cell Differentiation
Source: PubMed Central journal article supplement (PMC4745265; doi:10.3389/fphys.2016.00007), 2016-02-08

Supp 2B

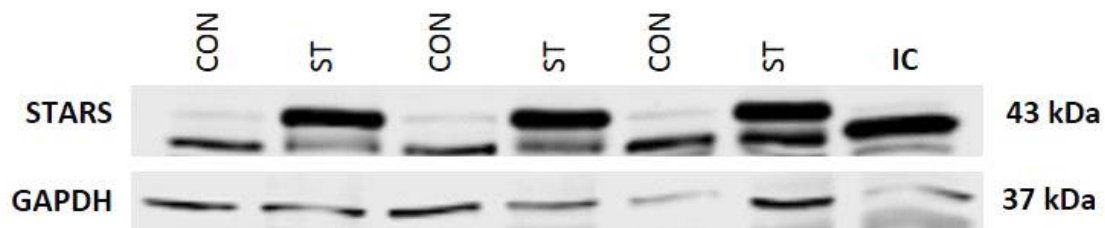

3D

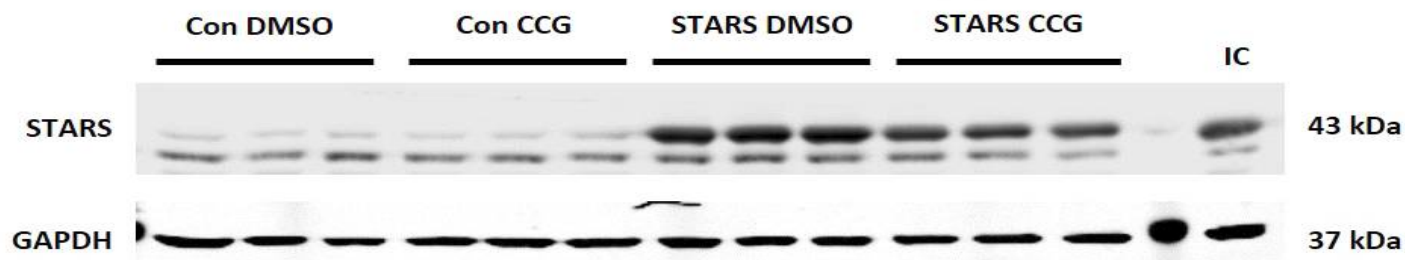

3F

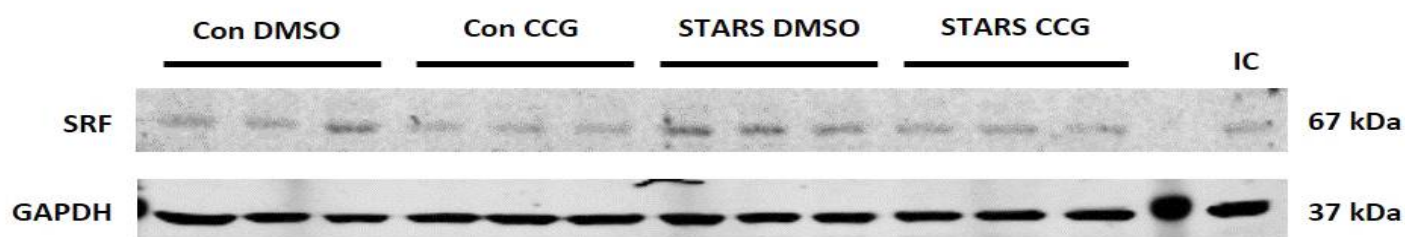

5B

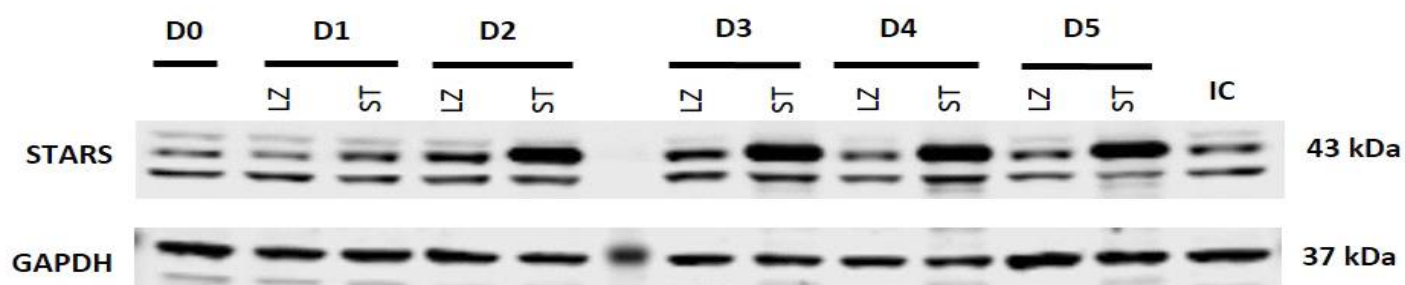

7G

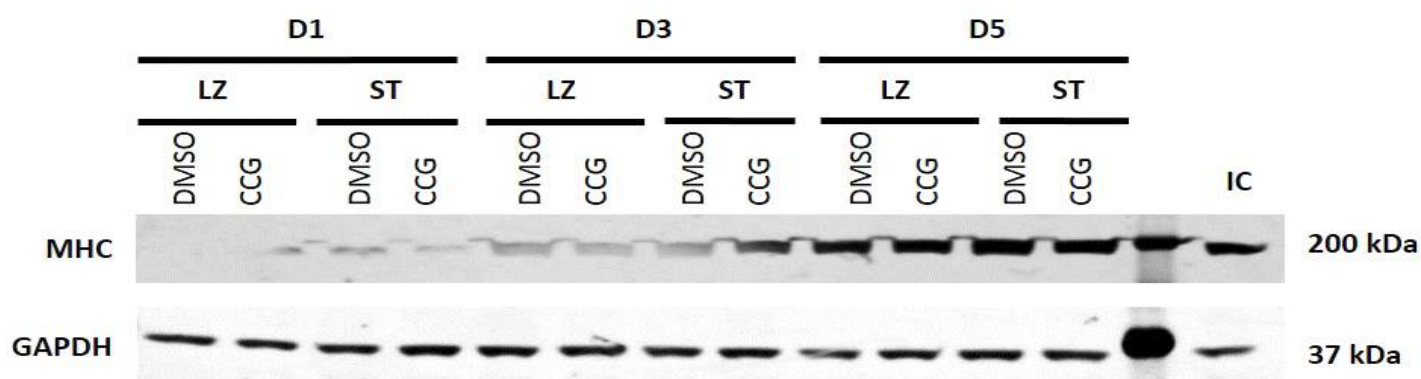

Supplement: DataSheet1.pdf [file DataSheet1.pdf]
